# Supplementary material
Source: publisher figshare collection journal article supplement (https://karger.figshare.com/ndownloader/files/33157130)
Supplement: Supplementary file 1 [file 33157130]

**Supplementary materials**

**Figure S1: Diagnostic analysis of hub miRNAs.**

AUC: area under the curve.

**Figure S2: Diagnostic analysis of target DEmRNAs.**

AUC: area under curve; DEmRNAs, differentially expressed mRNAs.

**Figure S3: Expression verification of target DEmRNAs.**

* represent P<0.05, ** represent P<0.01, P<0.05 was considered to indicate a statistically significant difference. IA: intracranial aneurysm; DEmRNAs, differentially expressed mRNAs.

**Table S1 KEGG function enrichment of DEmRNAs**

**Table S2 KEGG function enrichment of target DEmRNAs**

**Table S3 Clinical information of individual in vitro validation**

**Table S4 Primer sequence in the RT-PCR**
